# Supplementary material for: Development of a novel chromophore reaction-based fluorescent probe for biogenic amines detection
Source: Royal Society of Chemistry journal article supplement (doi:10.1039/d1tb01791h), 2021-01-01
Supplement: d1tb01791h1.pdf [file d1tb01791h1.pdf]

## **Development of a Novel Chromophore Reaction-based Fluorescent Probe for Biogenic Amines Detection**

Lingyun Wang<sup>\*a</sup>, Shuqi Xin<sup>a</sup>, Chufeng Zhang<sup>a</sup>, Xueguang Ran<sup>b</sup>, Hao Tang<sup>a</sup>, Derong Cao<sup>a</sup>

<sup>a</sup> Key Laboratory of Functional Molecular Engineering of Guangdong Province, School of Chemistry and Chemical Engineering, South China University of Technology, 381 Wushan Road, Guangzhou, China, 510641. E-mail: [lingyun@scut.edu.cn](mailto:lingyun@scut.edu.cn)

<sup>b</sup> Institute of Animal Science, Guangdong Academy of Agricultural Sciences, Ministry of Agriculture Key Laboratory of Animal Nutrition and Feed Science in South China, State Key Laboratory of Livestock and Poultry Breeding, Guangzhou, 510641, China. E-mail: [rxg59@aliyun.com](mailto:rxg59@aliyun.com)

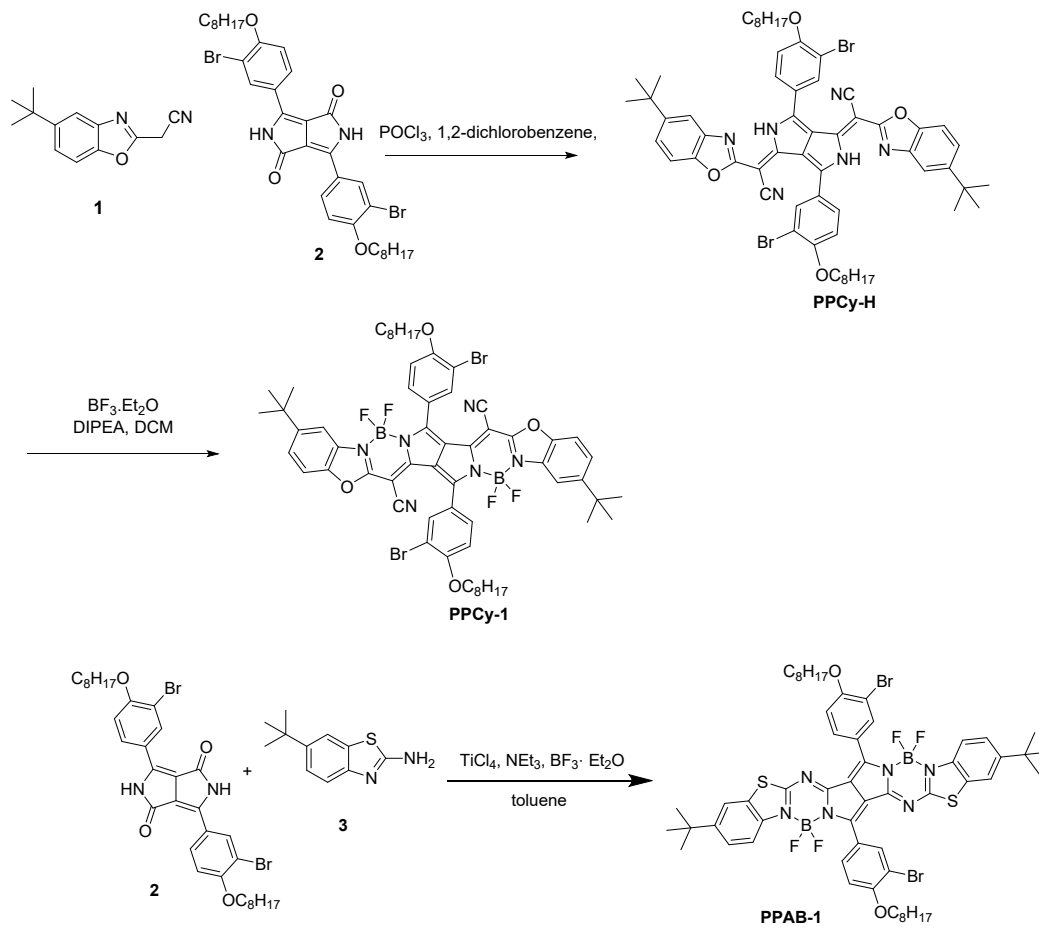

Scheme S1 The synthetic routes of **PPCy-1** and **PPAB-1**.

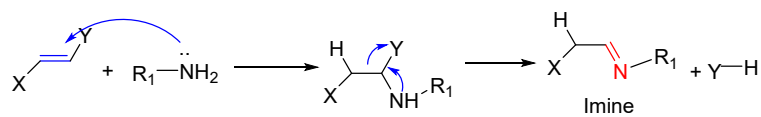

Tetrahedral intermediate  
(unstable)

eg.

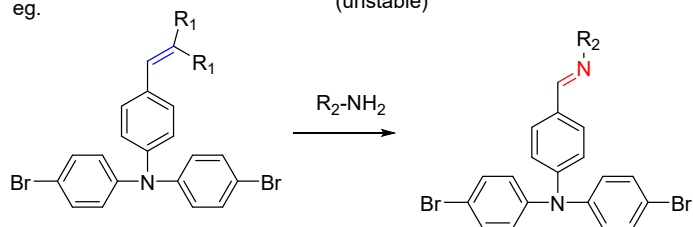

$\text{R}_1 = \text{COOEt}$  or  $\text{CN}$

Chem. Commun., 2014, 50, 872

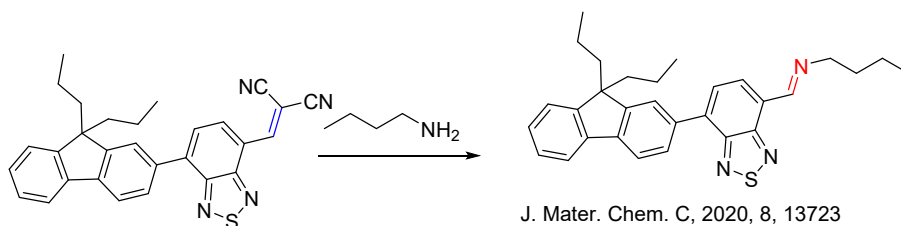

J. Mater. Chem. C, 2020, 8, 13723

Scheme S2 The possible reaction process *aza*-Michael addition between amine and electrophile and some examples.

**Table S1** The comparison of LOD, sensing characteristics and sensing mechanism with reported methods.

| Probes                                                                                                   | LOD                                                                                                | Response mechanisms                                                                   | Remarks                                                                                                                                                           | Ref.                                                |
|----------------------------------------------------------------------------------------------------------|----------------------------------------------------------------------------------------------------|---------------------------------------------------------------------------------------|-------------------------------------------------------------------------------------------------------------------------------------------------------------------|-----------------------------------------------------|
| 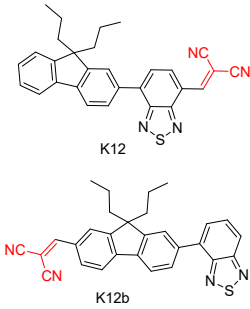 <p>K12</p> <p>K12b</p> | <p>Cad. vapors:<br/>130 ppb<br/><b>(K12)</b></p> <p>Cad. Vapors:<br/>610 ppb<br/><b>(K12b)</b></p> | <p>Solution: <i>aza</i>-Michael addition</p> <p>Films: photoinduced hole transfer</p> | <p>Reaction time:<br/><b>K12</b>: &gt;30 min<br/><b>K12b</b>: overnight</p> <p>High sensitivity to primary alkyl amines,</p> <p>Practical application:<br/>No</p> | <p>J. Mater. Chem. C, 2020, 8, 13723</p>            |
|                        | <p>Spm.: 180 nM</p> <p>Other diamines: 180-400 nM</p> <p>Cad. vapors: 4.3 ppm</p>                  | <p>Reaction-induced polarity-driven self-aggregation</p>                              | <p>Difficult to discriminative detection</p> <p>BAs and other amines, small spectral changes,</p> <p>Practical application: detect fish freshness</p>             | <p>ACS Appl. Mater. Interfaces, 2019, 11, 47207</p> |
|                       | <p>Cad.: 209 nM</p>                                                                                | <p>Dechlorination and condensation reaction</p>                                       | <p>Reaction time: 40 min, small spectral changes,</p>                                                                                                             | <p>Dyes and Pigments, 2021, 186, 108963</p>         |
|                       | <p>BAs: less than 0.2 <math>\mu</math>M</p>                                                        | <p>Nucleophilic addition</p>                                                          | <p>Reaction time: 10 min</p> <p>Practical application:<br/>No</p>                                                                                                 | <p>Analyst, 2016, 141, 827</p>                      |

|                                                                                    |                                                                                          |                                                                   |                                                                                                                                                            |                                     |
|------------------------------------------------------------------------------------|------------------------------------------------------------------------------------------|-------------------------------------------------------------------|------------------------------------------------------------------------------------------------------------------------------------------------------------|-------------------------------------|
| 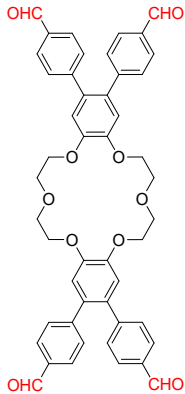  | Spd.: 46 nM                                                                              | Schiff base formation induced aggregation of terphenyl derivative | Reaction time: > 20 min<br>Practical application: detect Spd in artificial urine sample                                                                    | Sensor Actuat. Chem, 2018, 258, 841 |
|   | Spm.: 0.193 $\mu$ M                                                                      | Chromophore reaction                                              | Reaction time: 60 s, high selectivity to Spm and Spd, but slow reactivity to Put and Cad<br>Practical application: detect fish freshness                   | Anal. Chim. Acta 2020, 1135, 38     |
|  | Put.: 0.179 $\mu$ M<br>Cad.: 0.229 $\mu$ M<br>Spd.: 0.043 $\mu$ M<br>Spm.: 0.066 $\mu$ M | Novel chromophore reaction                                        | Reaction time: 1 min, high selectivity and high sensitivity to BAs, Large spectral changes<br>Practical application: detect BAs vapor and shrimp freshness | This work                           |

Abbr: Putrescine (Put), cadaverine (Cad), spermine (Spm), spermidine (Spd)

Table S2 The vapor pressure,  $pK_a$  and relative vapor density of different amines.

| Amines             | Vapor pressure<br>(kPa) | $pK_a$             | Relative vapor<br>density (air = 1) |
|--------------------|-------------------------|--------------------|-------------------------------------|
| 1,3-Diaminepropane | 0.58                    | 10.94, 9.82        | 2.5                                 |
| Putrescine         | 0.31                    | 10.80              | No data                             |
| Cadaverine         | 0.13                    | 10.05              | No data                             |
| Spermidine         | 0.036                   | 11.56, 10.80, 9.52 | No data                             |
| Trimethylamine     | 214.6                   | 9.80               | 2.04                                |
| Triethylamine      | 7.6                     | 10.78              | 3.5                                 |
| Ammonia            | 48.0                    | 9.23               | 0.6                                 |

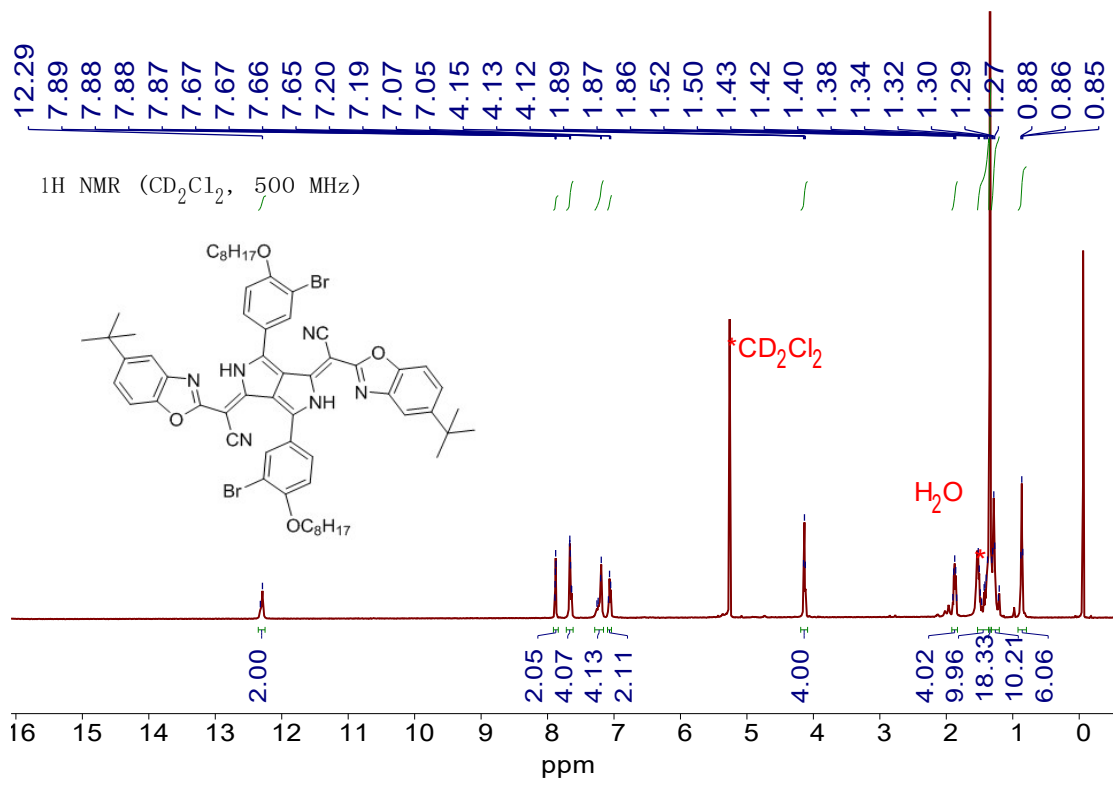

Figure S1  $^1H$  NMR spectrum of PPCy-H

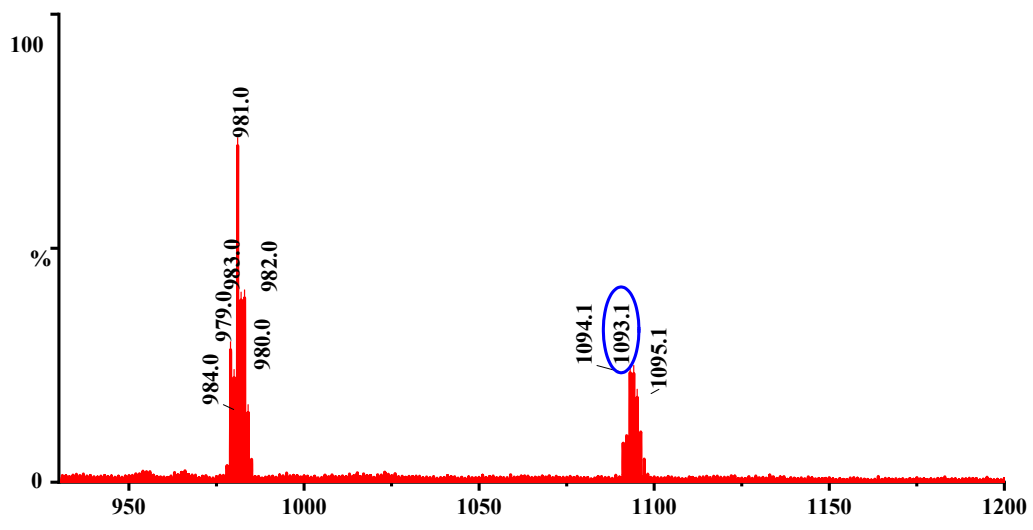

Figure S2 MALDI-TOF spectrum of PPCy-H

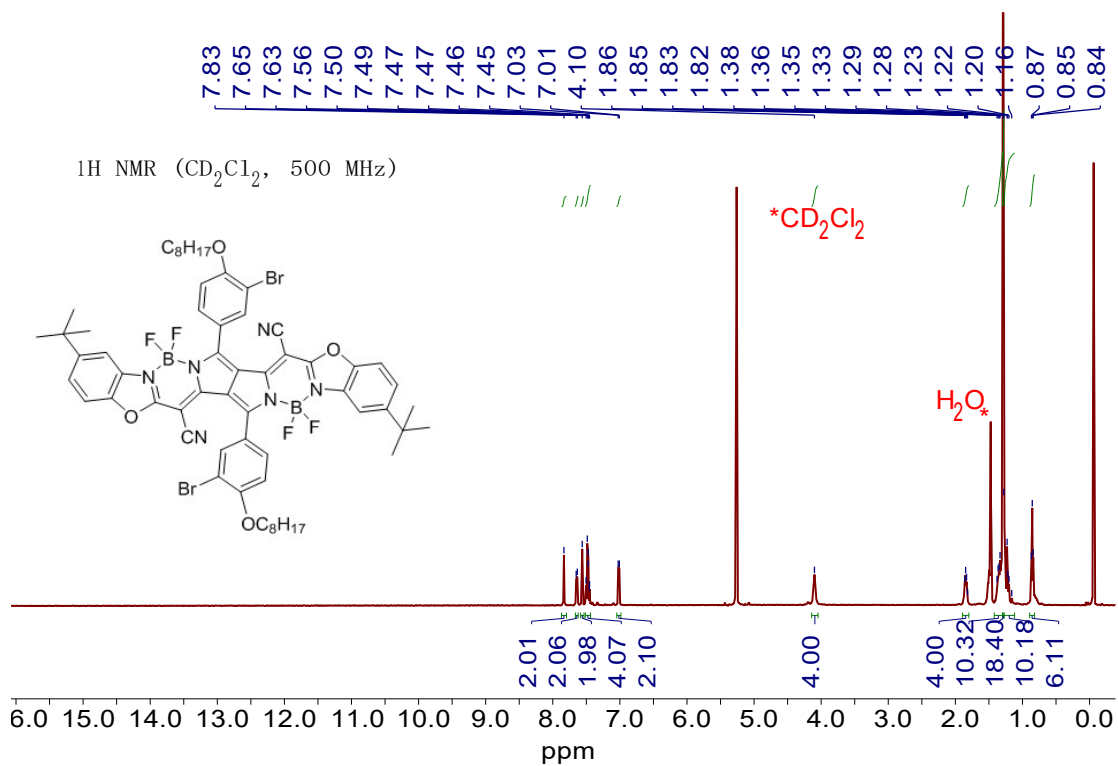

Figure S3 <sup>1</sup>H NMR spectrum of PPCy-1

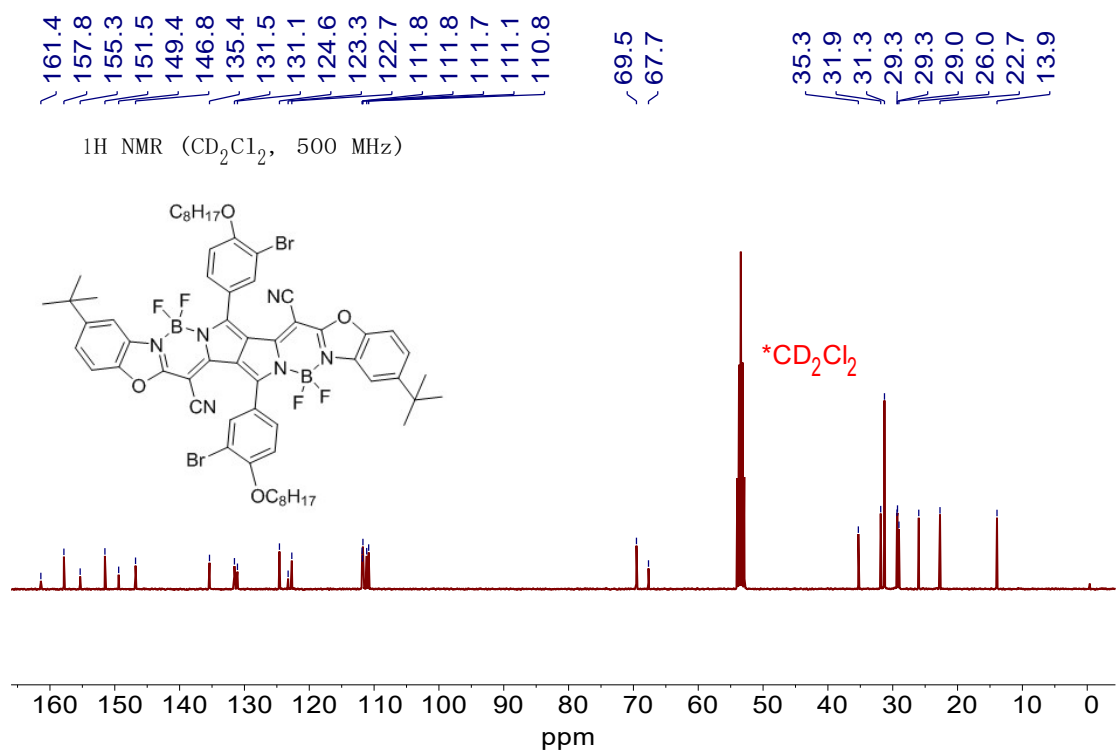

Figure S4 <sup>13</sup>C NMR spectrum of PPCy-H



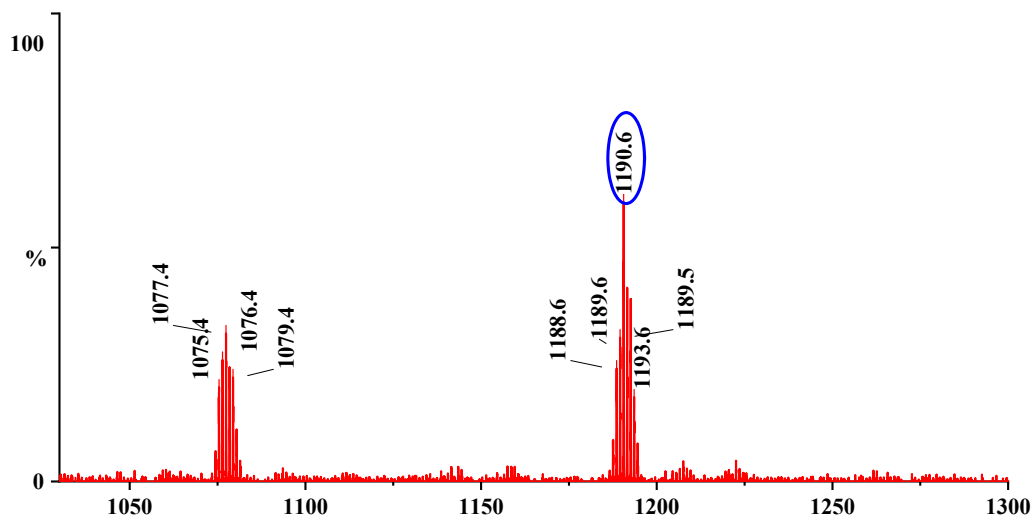

Figure S5 MALDI-TOF spectrum of **PPCy-1**

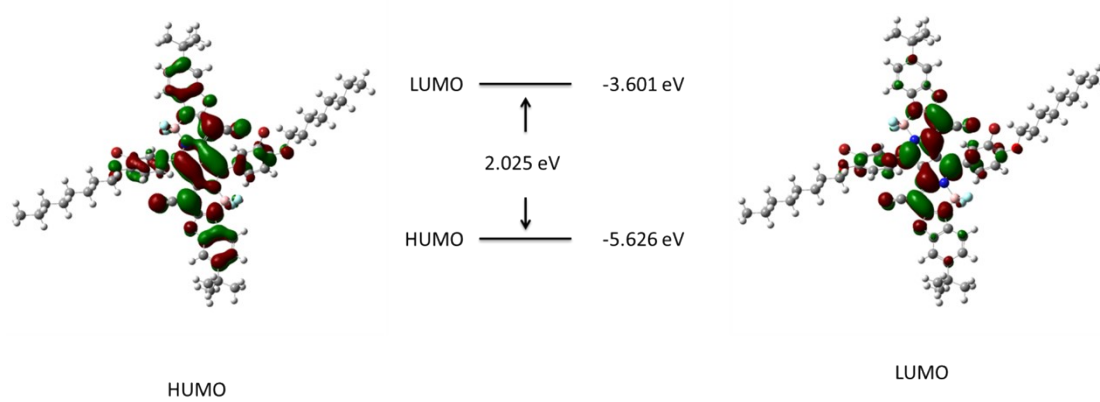

Figure S6 DFT calculation of **PPCy-1**

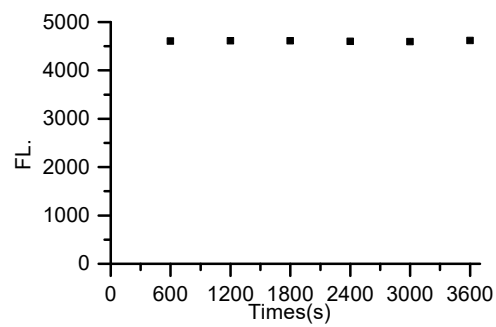

Figure S7 The emission intensity at 720 nm of **PPCy-1** after exposure xenon lamp (150 W) for different time.

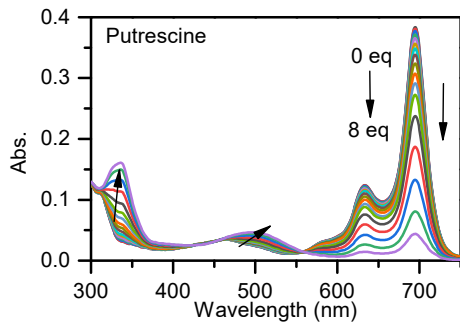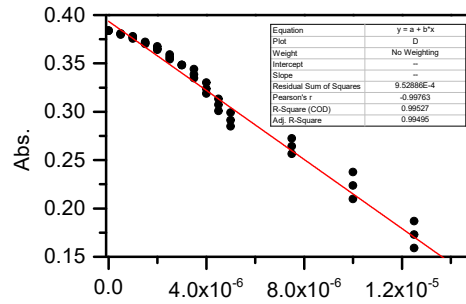

Linear Equation:  $Y = -18192.8X + 0.39761$   $R = 0.99601$

$$S = 1.82 \times 10^4 \quad \delta = \sqrt{\frac{\sum (A_0 - A_1)^2}{N - 1}} = 0.00109068786 \quad (N = 11) \quad K$$

= 3

$$LOD = K \times \delta / S = 3 \times 0.00109 / (1.82 \times 10^4) = 0.179 \pm 0.00415 \mu M$$

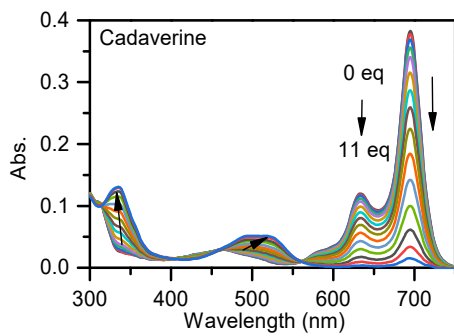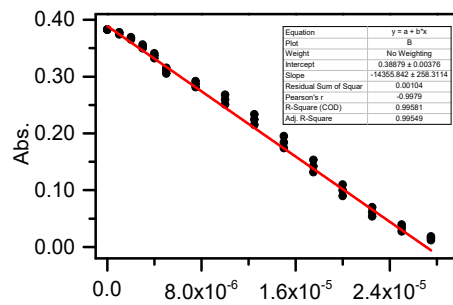

Li

near Equation:  $Y = -14355.8X + 0.38879$   $R = 0.9952$

$$S = 1.43 \times 10^4 \quad \delta = \sqrt{\frac{\sum (A_0 - A_1)^2}{N - 1}} = 0.00109068786 \quad (N = 11) \quad K$$

= 3

$$LOD = K \times \delta / S = 3 \times 0.00109 / (1.43 \times 10^4) = 0.229 \pm 0.00411 \mu M$$

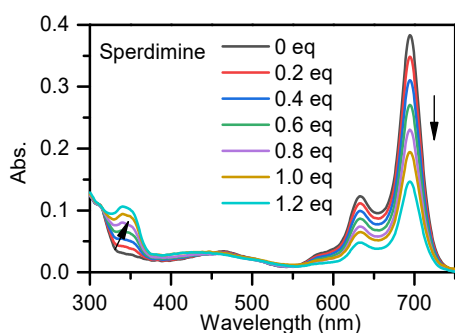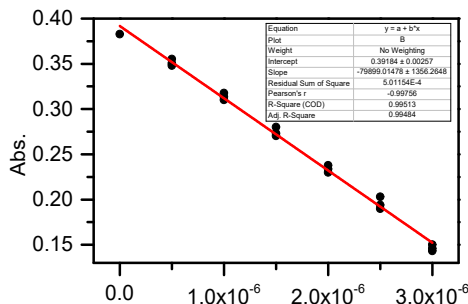

Linear Equation:  $Y = -76505.18X + 0.38844$   $R = 0.99909$

$$S = 7.65 \times 10^4 \quad \delta = \sqrt{\frac{\sum (A_0 - A_1)^2}{N - 1}} = 0.00109068786 \quad (N = 11) \quad K = 3$$

$$LOD = K \times \delta / S = 3 \times 0.00109 / (7.65 \times 10^4) = 0.0427 \pm 0.00102 \mu\text{M}$$

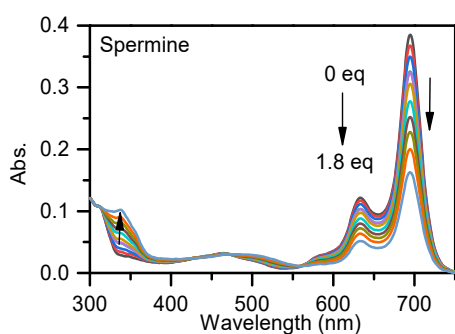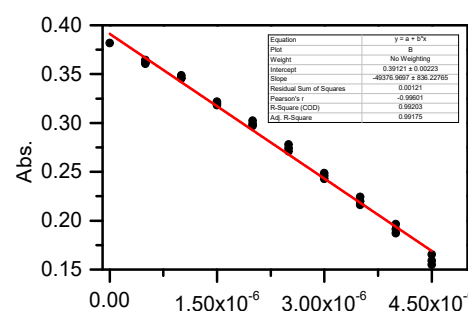

Linear Equation:  $Y = -49377.0X + 0.39121$   $R = 0.99907$

$$S = 4.93 \times 10^4 \quad \delta = \sqrt{\frac{\sum (A_0 - A_1)^2}{N - 1}} = 0.00109068786 \quad (N = 11) \quad K = 3$$

$$LOD = K \times \delta / S = 3 \times 0.00109 / (4.93 \times 10^4) = 0.0663 \pm 0.00112 \mu\text{M}$$

Figure S8 Concentration-dependent UV-vis spectra and linear relationship of absorbance at 695 nm of PPCy-1 (2.5  $\mu\text{M}$ ) in presence of putrescine, cadaverine, spermine, spermidine at 25  $^\circ\text{C}$ , each solution was mixed and left for 2 min.



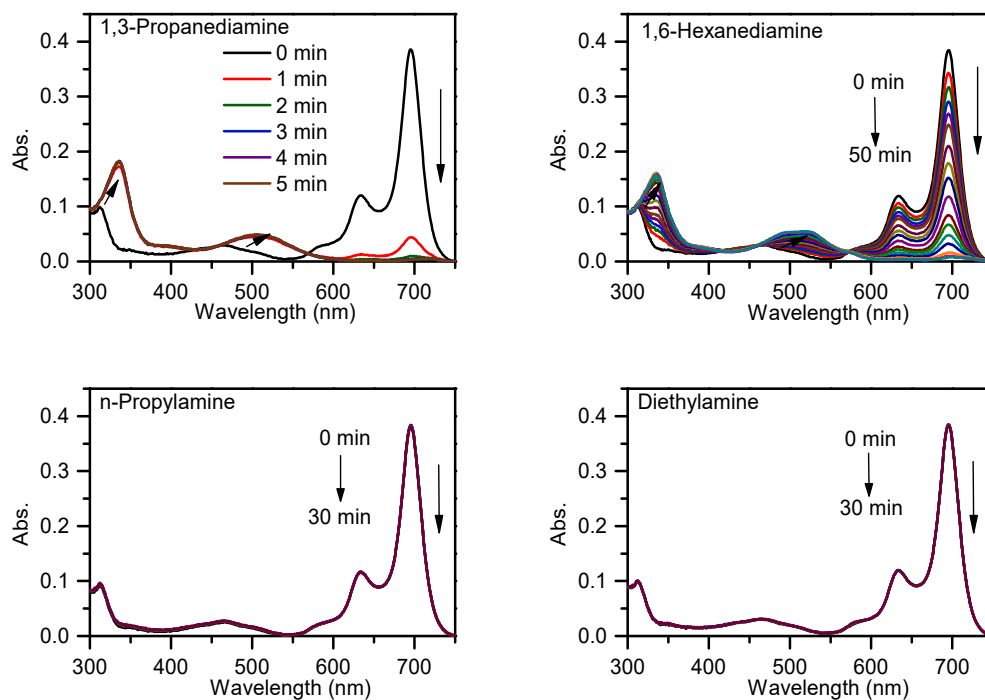

Figure S9 The time-dependent UV-Vis spectra of **PPCy-1** ( $2.5 \mu\text{M}$ ) in presence of 1,3-propanediamine, 1,6-hexanediamine, n-propylamine and diethylamine ( $50 \mu\text{M}$ ) at room temperature.

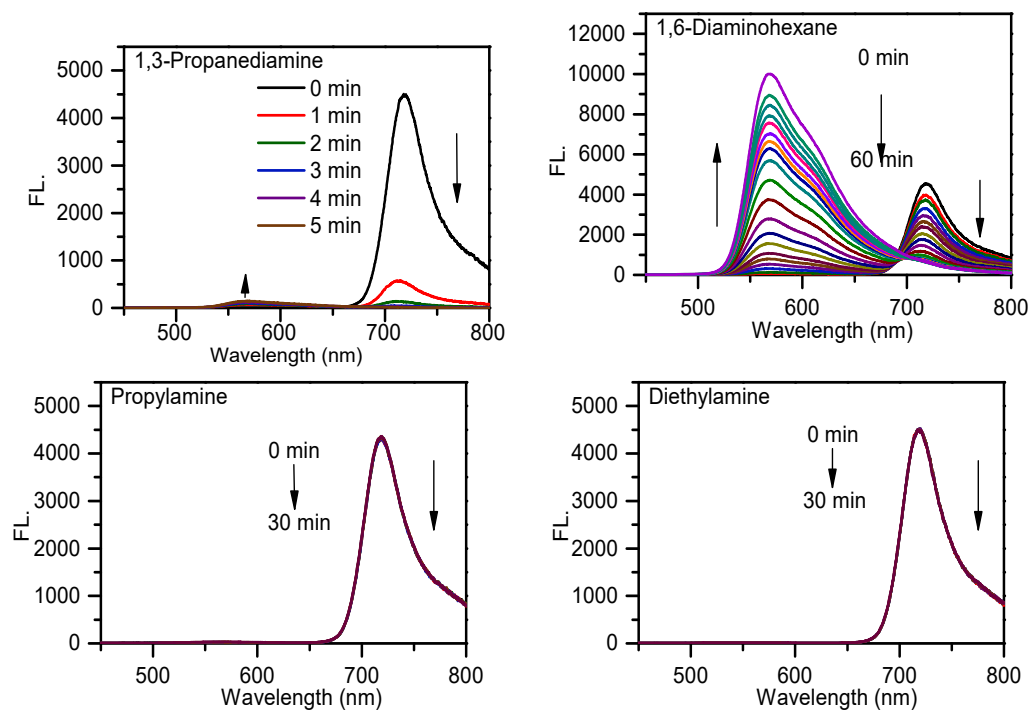

Figure S10 The time-dependent emission spectra of **PPCy-1** (2.5  $\mu\text{M}$ ) in presence of 1,3-propanediamine, 1,6-diaminohexane, propylamine and diethylamine (50  $\mu\text{M}$ ) at room temperature.

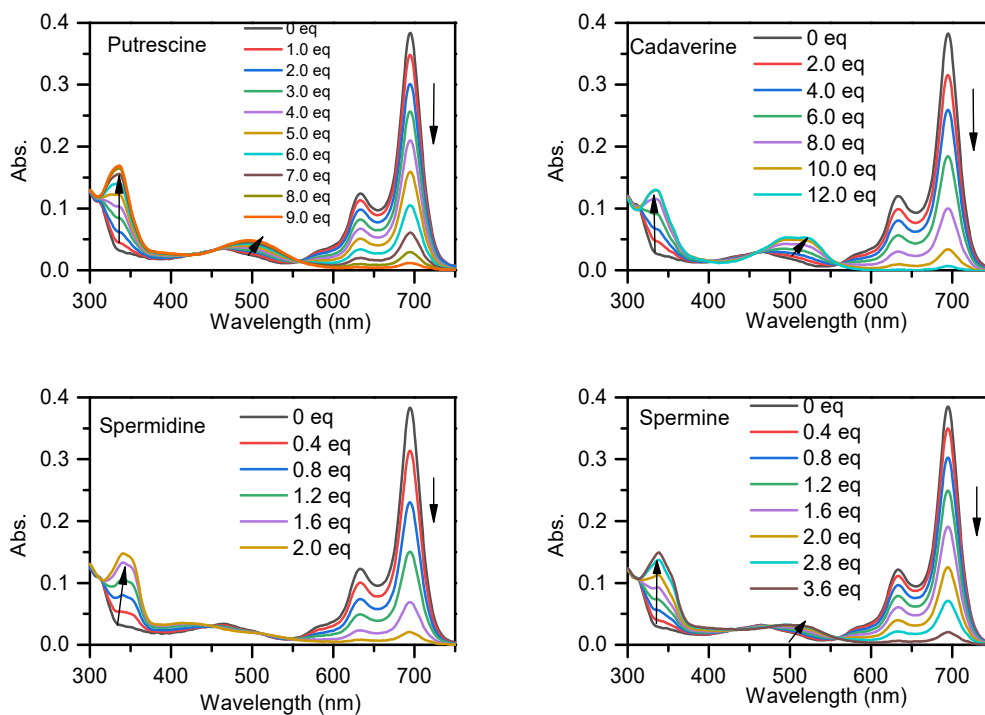

Figure S11 The BAs concentration-dependent UV-vis spectra of **PPCy-1** (2.5  $\mu\text{M}$ ) in presence of putrescine, cadaverine, spermidine, and spermine at room temperature for 2 min.



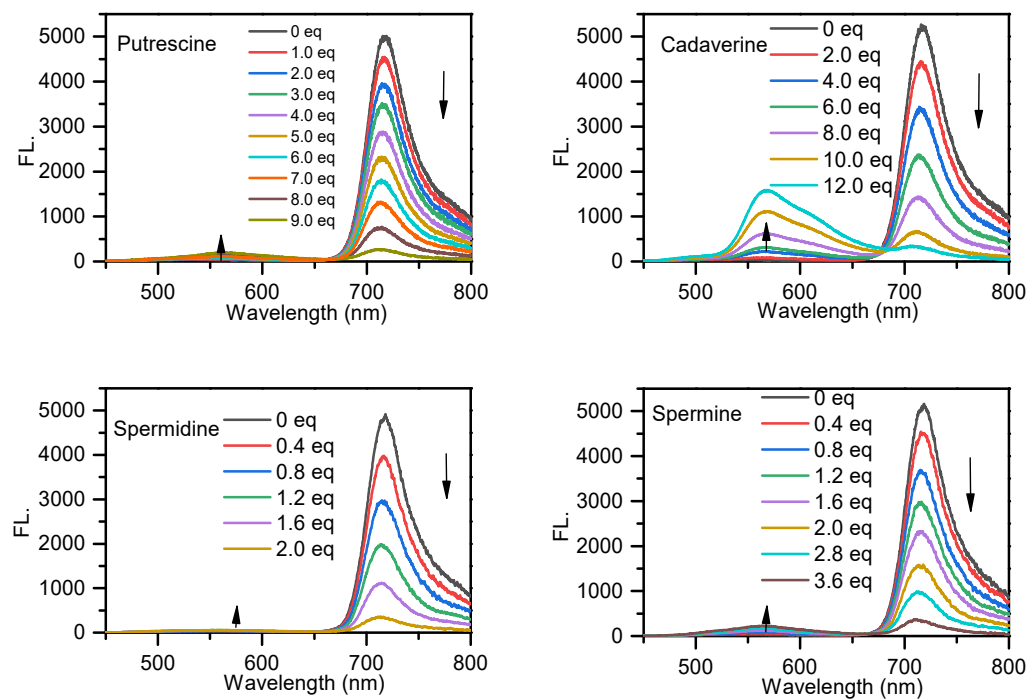

Figure S12 The BAs concentration-dependent emission spectra of **PPCy-1** (2.5  $\mu\text{M}$ ) in presence of putrescine, cadaverine, spermidine, and spermine at room temperature for 2 min.

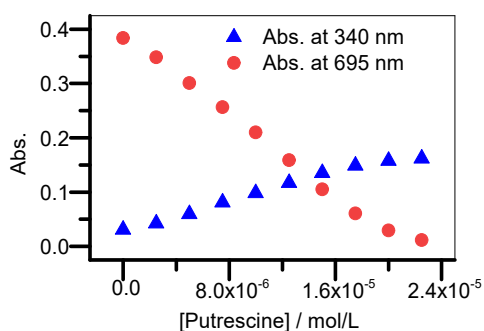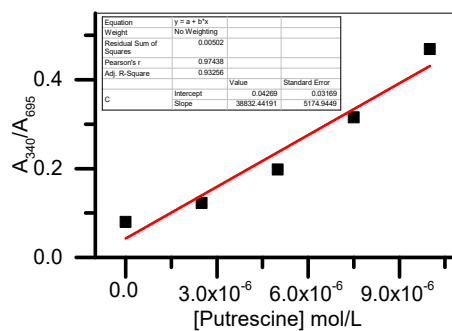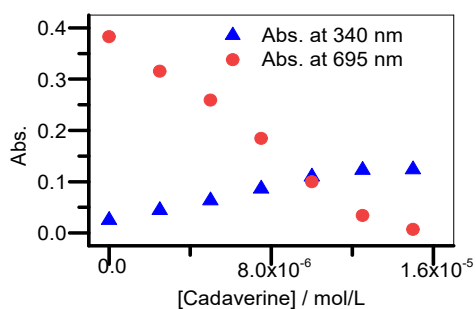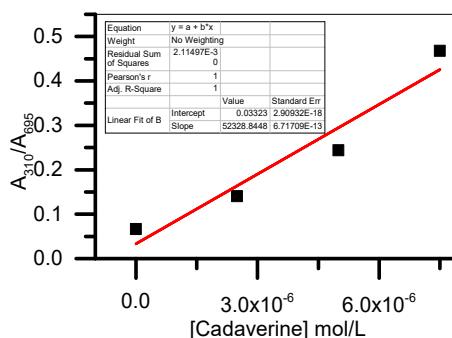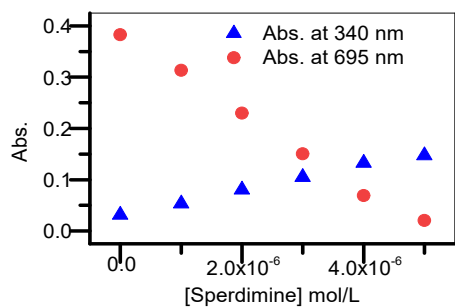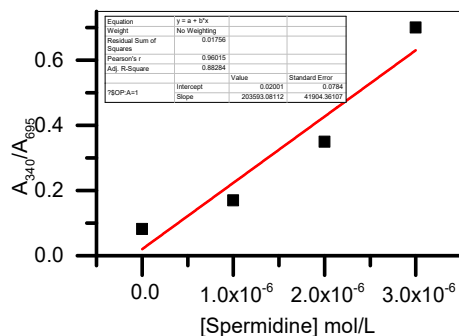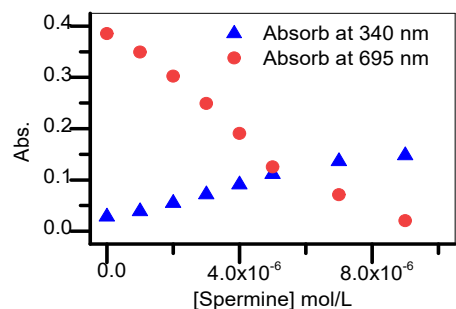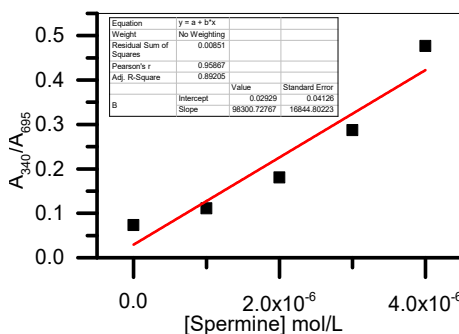

The standard deviation and slope were obtained by plotting ratio of absorption intensities at 340 nm and 695 nm with concentration of amine. Detection limit =  $3 \sigma/K$ ,  $\sigma$  = Standard error = 0.00109,  $K$  = Slope = 38832 (putrescine), 52328 (cadaverine),

203593 (spermidine) and 98300 (spermine). Detection Limit = 0.084 (putrescine), 0.063 (cadaverine), 0.016 (spermidine) and 0.033  $\mu\text{M}$  (spermine).

Figure S13 Determination of limit of detection (LOD) using linearly-fitted ratiometric plot using absorption intensities at 340 nm and 695 nm of putrescine, cadaverine, spermidine, and spermine.

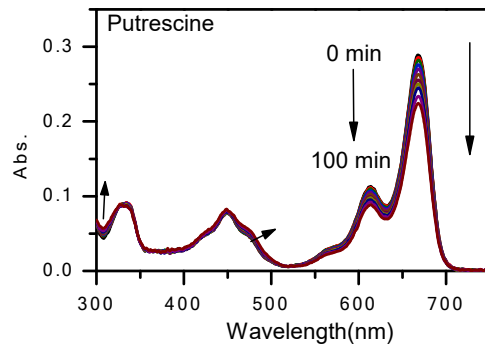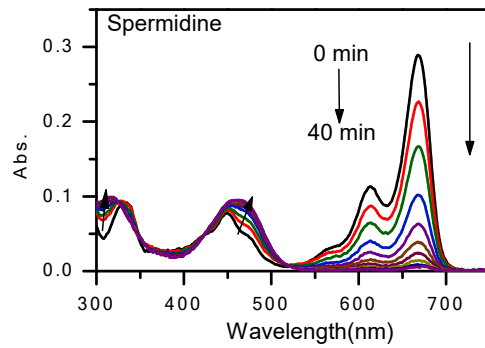

Figure S14 The time-dependent UV-Vis spectra of **PPAB-1** (2.5  $\mu\text{M}$ ) in presence of spermidine, cadaverine (50  $\mu\text{M}$ ) at room temperature.

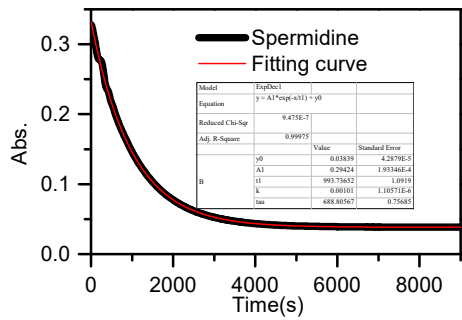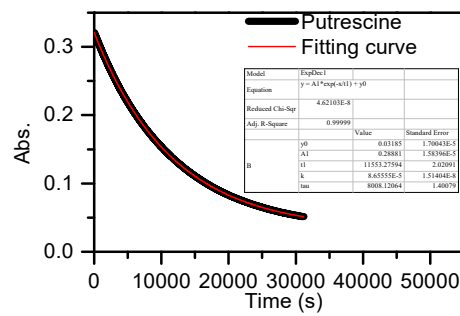

Figure S15 The reaction kinetics of **PPAB-1** (2.5  $\mu\text{M}$ ) in presence of spermidine, cadaverine (50  $\mu\text{M}$ ) at room temperature.

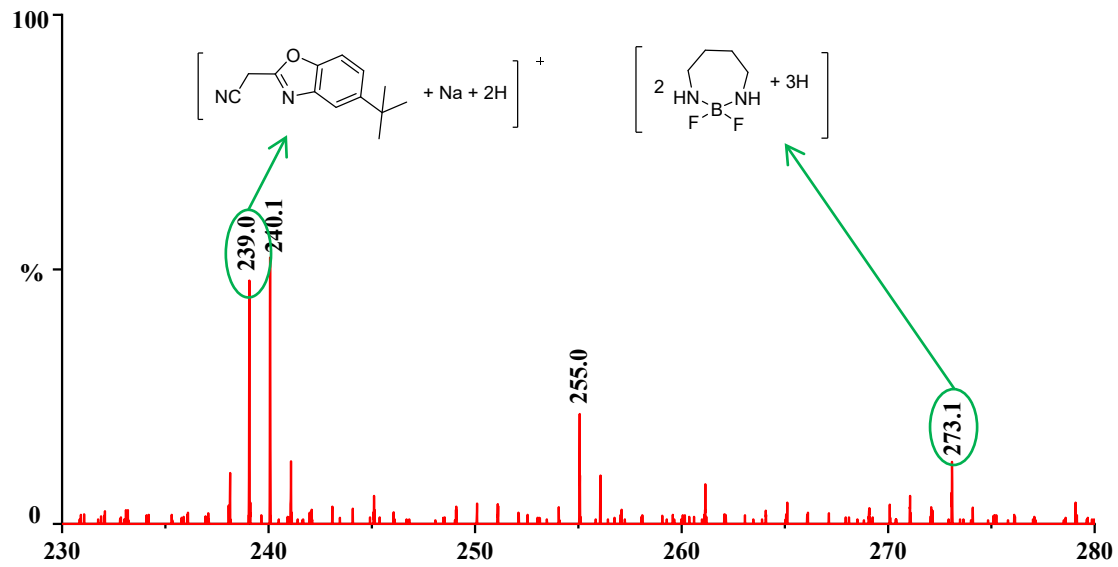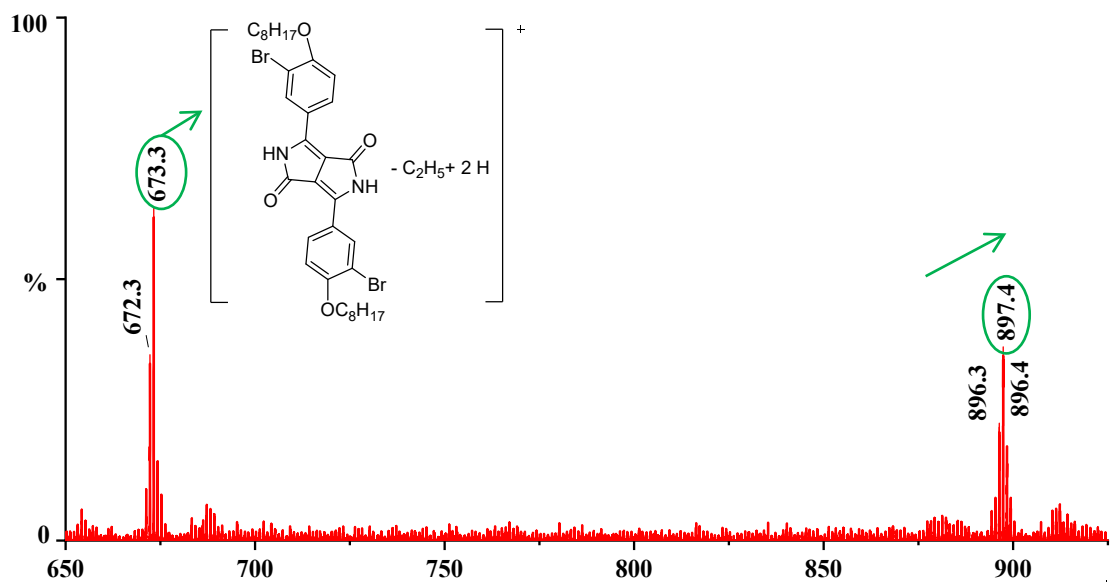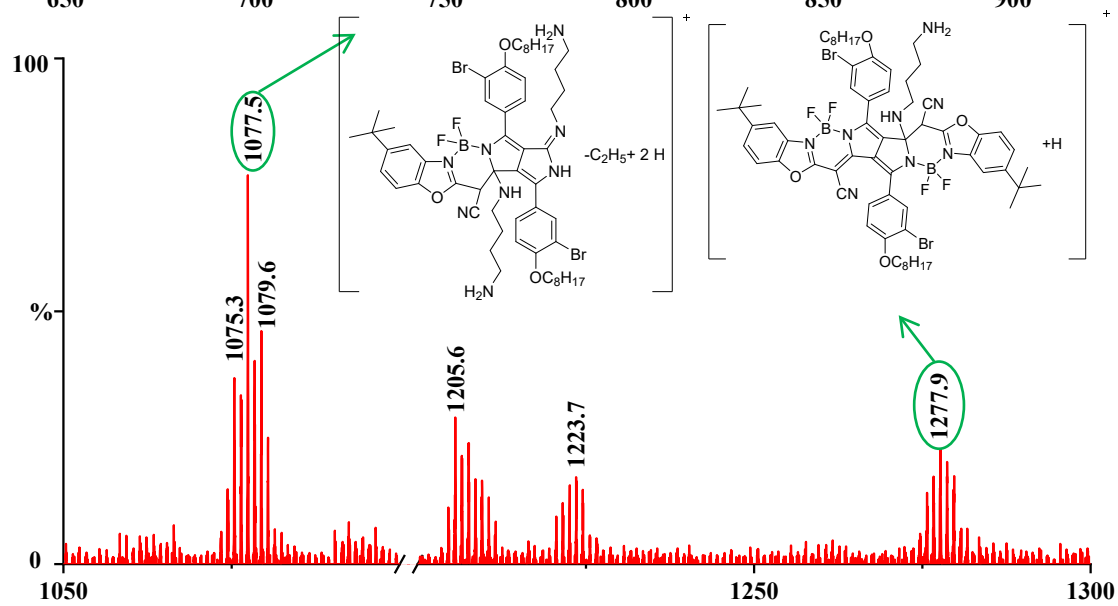

Figure S16 The HRMS spectra of **PPCy-1** (2.5  $\mu\text{M}$ ) in presence of cadaverine (50  $\mu\text{M}$ ) at room temperature.

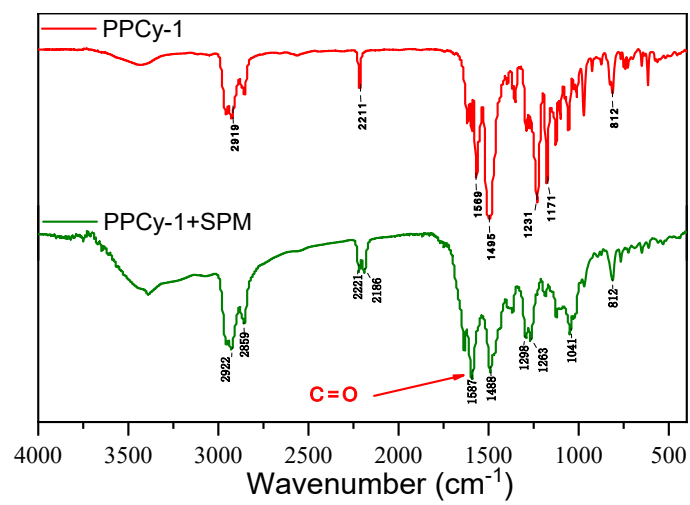

Figure S17 The FTIR spectra of **PPCy-1** in absence and presence of spermidine.

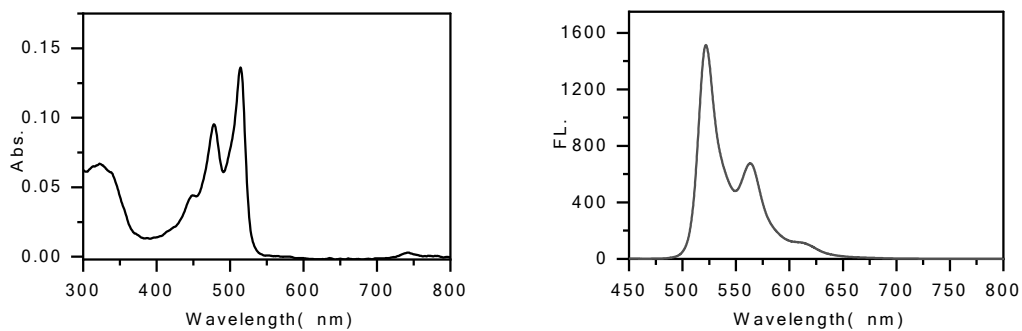

Figure S18 (a) the UV-Vis and (b) emission spectra of DPP compound **2** (2.5  $\mu\text{M}$ ).

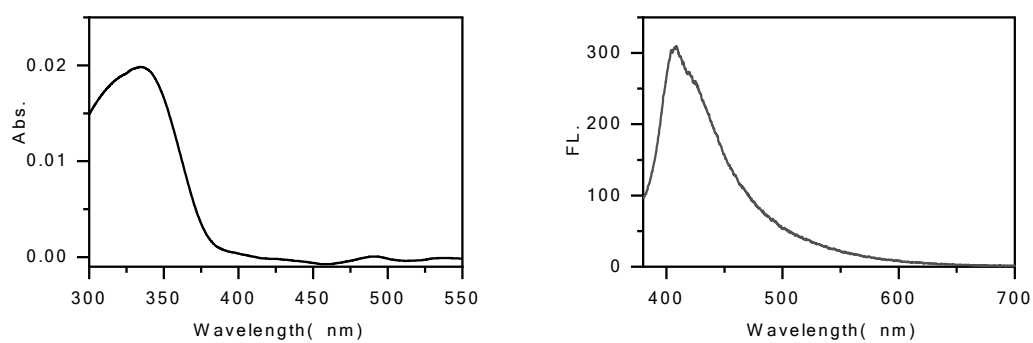

Figure S19 (a) the UV-Vis and emission spectra of heteroaromatic acetonitrile **1** (2.5  $\mu\text{M}$ ) in  $\text{CHCl}_3$ .



(a) Intermolecular H-bonding induced by **2**

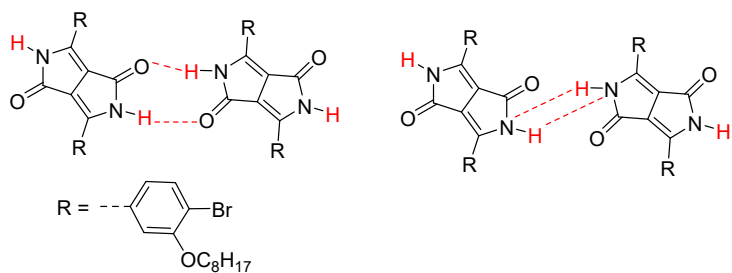

(b) Intermolecular H-bonding induced by **2** and amines

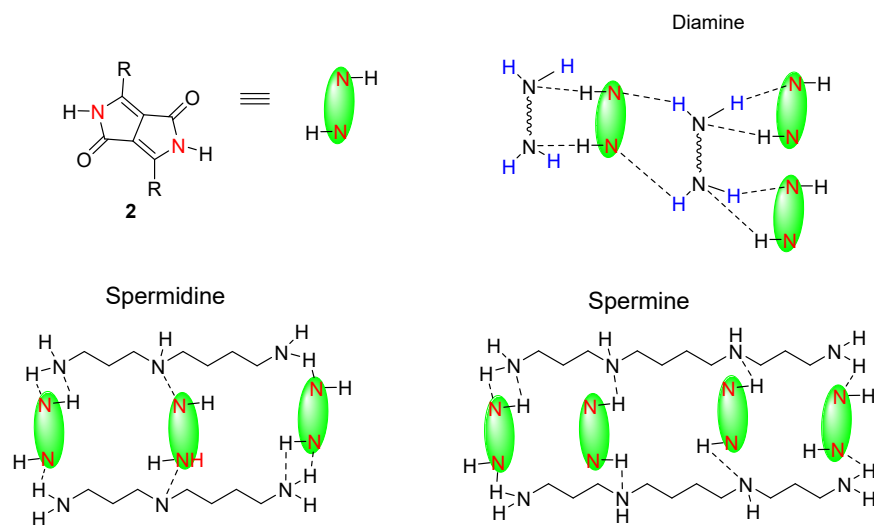

Figure S20 (a) The possible intermolecular H-bonding of diketopyrrolopyrrole (**2**). (b)

The possible intermolecular H-bonding of between different amines and diketopyrrolopyrrole (**2**).

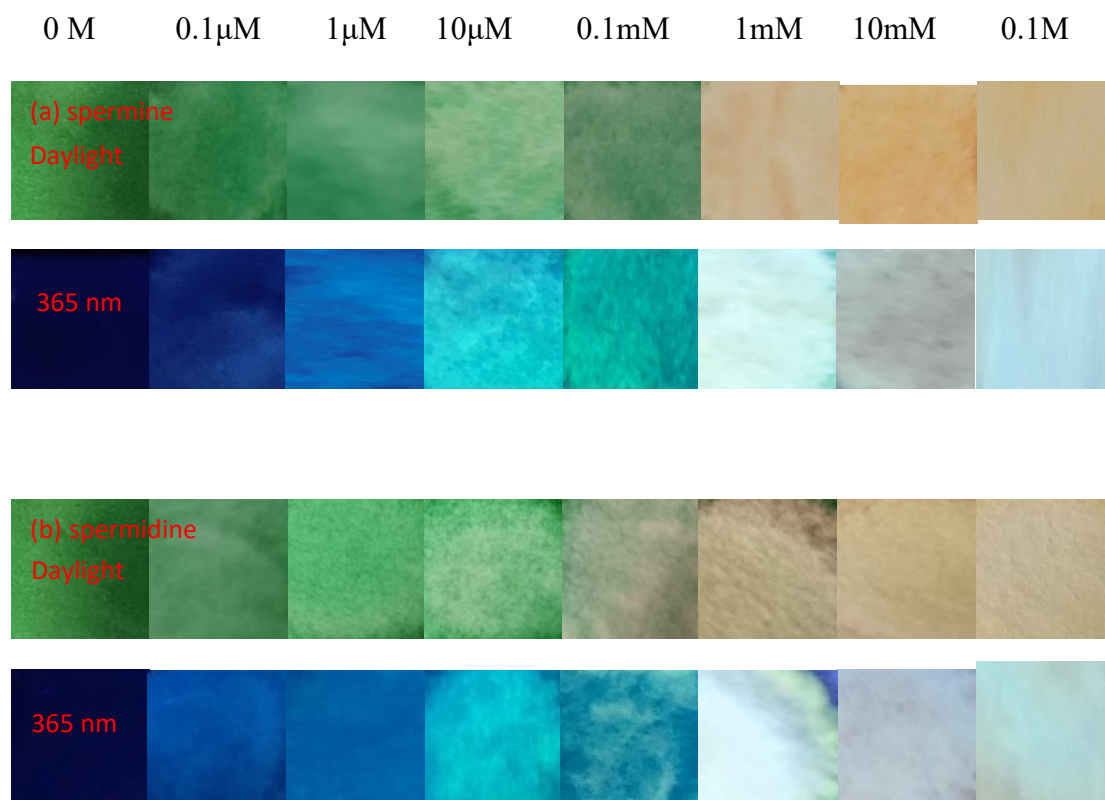

Figure S21. The color and emission changes of **PPCy-1**-loaded filter paper with colorimetric (top) and fluorescent (bottom) dual modes in presence of (a) spermine, and (b) spermidine at 25 °C.

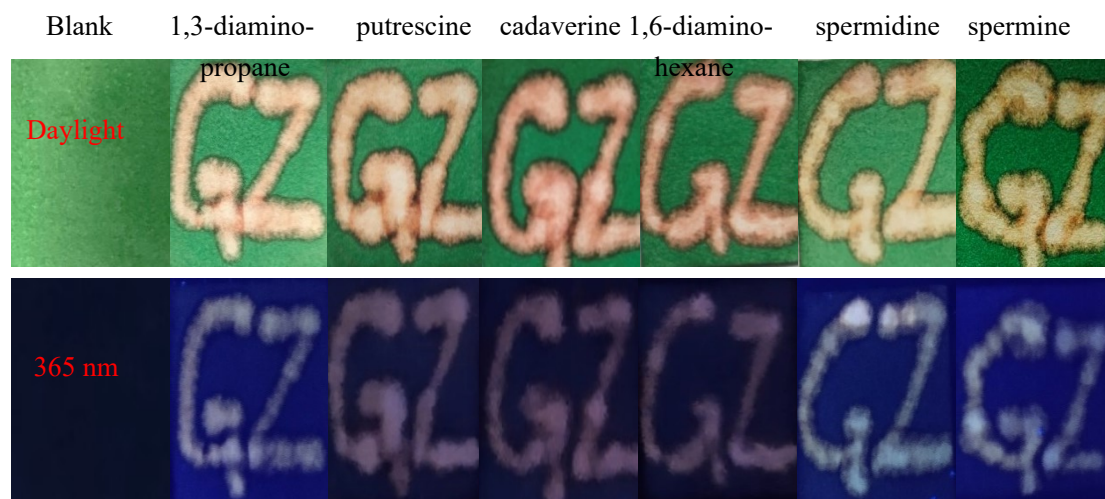

Figure S22. Photos of **PPCy-1**-loaded filter paper written “GZ” letters before and after exposure to amine solution (1 mM) in dioxane under daylight and UV light. From left to right: blank, 1,3-diaminopropane, putrescine, cadaverine, 1,6-diaminohexane, spermidine, spermine.

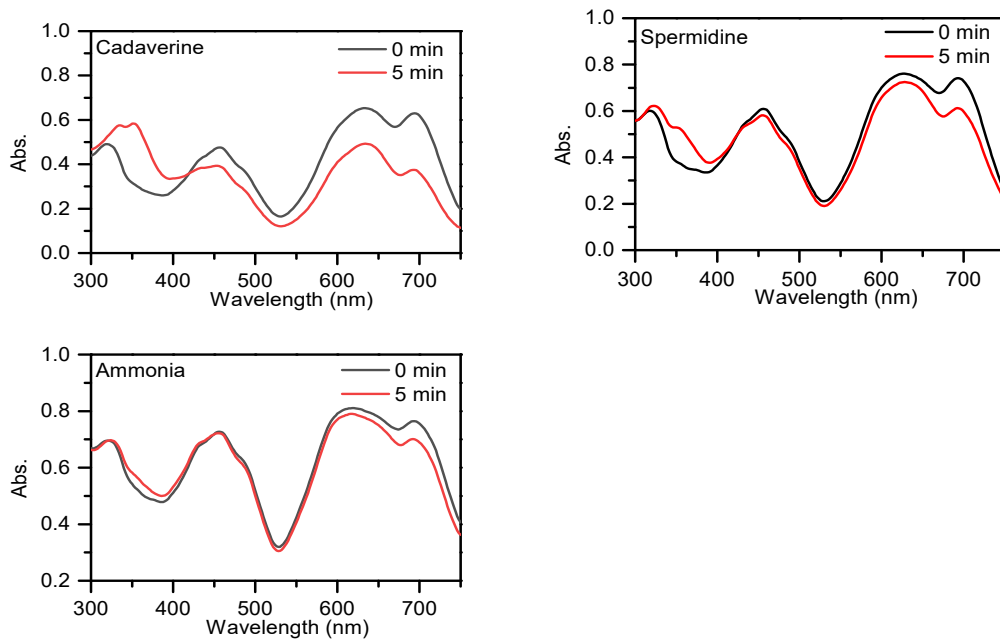

Figure S23. UV-vis spectra and photos of **PPCy-1**-loaded filter paper before and after exposure to spermidine and ammonia vapor.

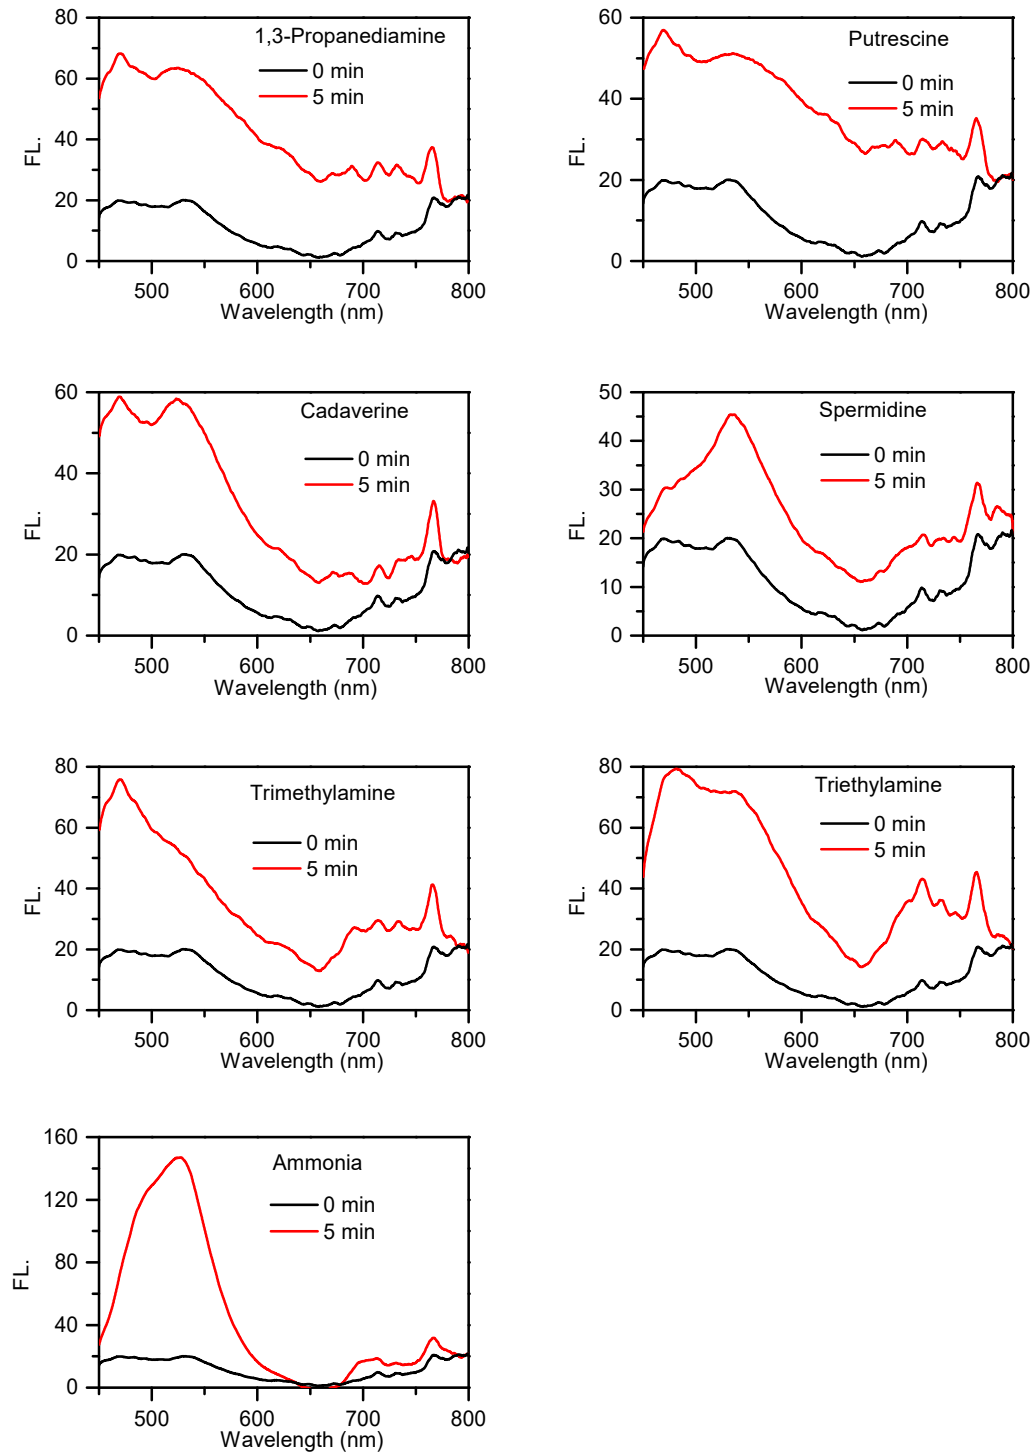

Figure S24. The emission spectra and photos of **PPCy-1**-loaded filter paper before and after exposure to trimethylamine, triethylamine, putrescine, 1,3-diaminepropane, cadaverine, spermidine and ammonia vapor.

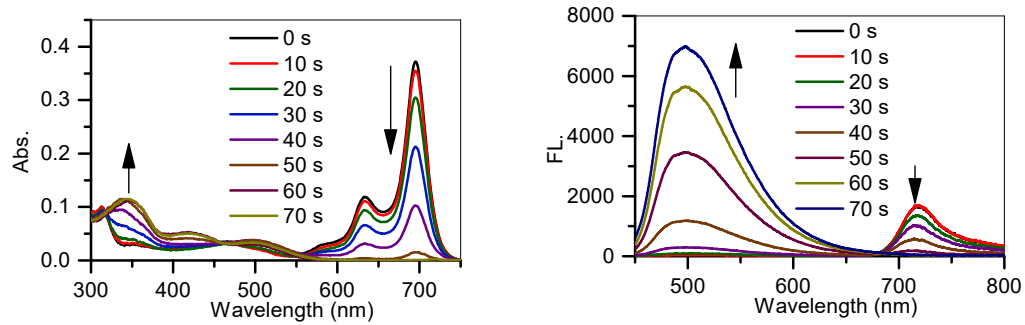

Figure S25 The time-dependent (left) absorption and (right) emission spectra of **PPCy-1** (2.5  $\mu\text{M}$ ) solution in presence of ammonia vapor at room temperature.

(a) -4 °C

0 h

12 h

24 h

36 h

48 h

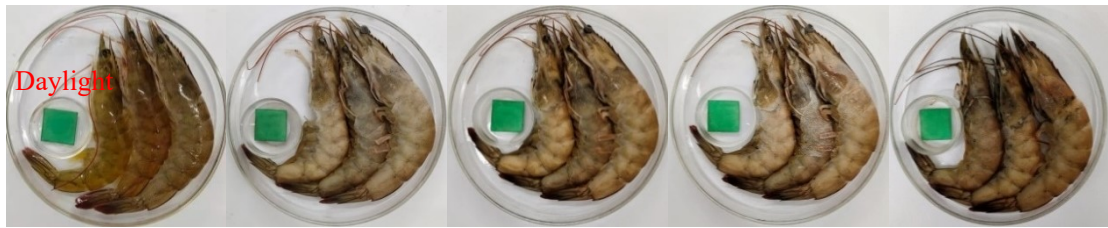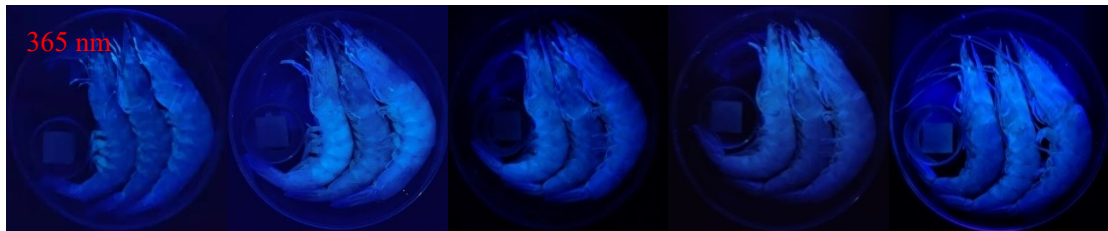

(b) 4 °C

0 h

12 h

24 h

36 h

48 h

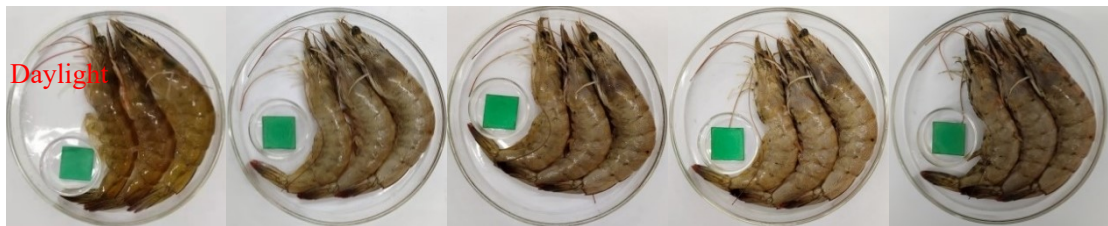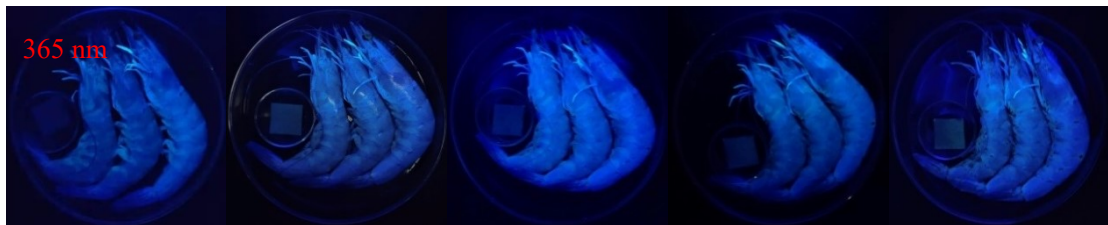

Figure S26. Photos of monitoring shrimp spoilage at (a) -4 °C and (b) 4 °C by PPCy-1-loaded filter paper under daylight and 365 nm irradiation.

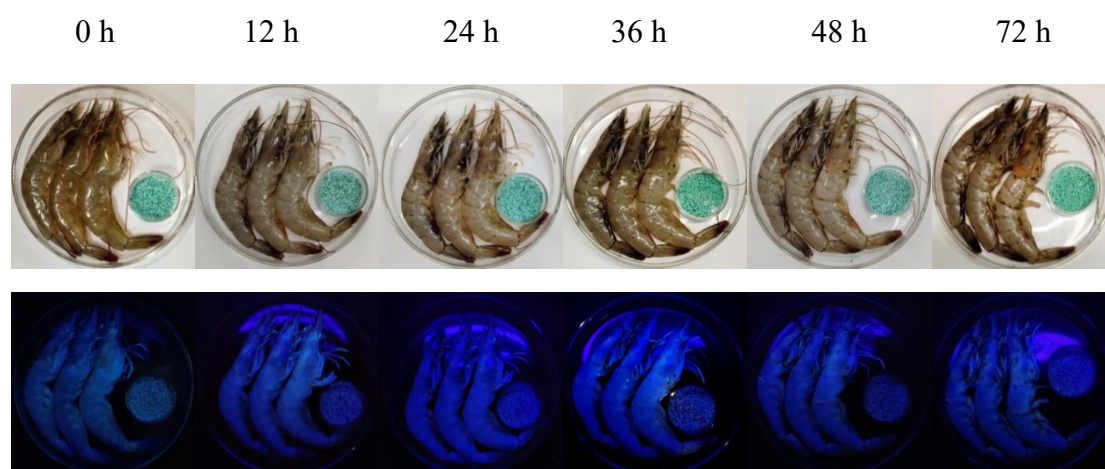

Figure S27. Photos of monitoring shrimp spoilage at 4 °C by **PPCy-1**-loaded CAD-40 resin under daylight and 365 nm irradiation.
